# Supplementary material for: Prevalence of human pathogenic Yersinia enterocolitica in Swedish pig farms
Source: PubMed Central journal article supplement (PMC6020225; doi:10.1186/s13028-018-0393-5), 2018-06-25
Supplement: 13028_2018_393_MOESM1_ESM.pdf [file 13028_2018_393_MOESM1_ESM.pdf]

Statens Veterinärmedicinska Anstalt  
Studie om förekomsten av *Yersinia enterocolitica* i grisbesättningar

This questionnaire is automatically read by a computer program. Please use a pen for filling in your answers.  
Check:  You can check any number of boxes in selection questions.  
Uncheck to correct:  For questions with a range (1–5) choose the answer the mark that fits best.

Följ bifogade provtagningsinstruktion, och fyll i nedanstående frågor om besättningen. **Sida 1 och 2.**

**Gårdens löpnummer:**

### 1 Frågor om besättningen

1.1 Töms slaktgrisavdelningen mellan omgångar?

- Alltid
- Nästan alltid
- Oftast
- Aldrig/Sällan

1.2 Vilka metoder används vid rengöring av slaktgrisstallet?(Du kan välja ett eller flera alternativ)

- Mekanisk rengöring
- Rengöring med högtryck (kallt vatten)
- Rengöring med högtryck (varmt vatten)
- Rengöring med högtryck (med rengöringsmedel)
- Desinfektionsmedel används
- Torrperiod efter rengöring eller desinfektion

Hur många dagar är torrperioden?

Annat:

1.3 Har slaktgrisarna tillgång till utevistelse?

- Ja
- Nej

1.4 Vilken typ av foder ges till slaktgrisarna?

- Torr foder
- Blötfoder

1.5 Vilket eller vilka val beskriver bäst fodret? (Du kan välja ett eller flera alternativ)

- Färdigfoder
- Koncentrat och Spannmål
- Vassle tillsätts
- Vatten tillsätts

Annan beskrivning:

1.6 Finns det ett gnagarkontrollprogram?

- Ja
- Nej

1.7 Ser du spillning eller märken av gnagare i stallet?

- Alltid
- En gång i veckan
- En gång i månaden
- Aldrig/Sällan

1.8 Ser du fåglar, eller spillning/märken av fåglar i stallet?

- Alltid
- En gång i veckan
- En gång i månaden
- Aldrig/Sällan

1.9 Vilken typ av golvmaterial finns i slaktgrisboxarna?

- Helgolv med skrapgång
- Helgolv med spaltgolv på samma höjd
- Helgolv med nedsänkt spaltgolv
- Helgolv med upphöjt spaltgolv
- Djupströbädd
- Utegrisar

Annat:

1.10 Vilket strömedel används?

- Halm
- Spån
- Torv
- Torvmix
- Halmspånpellets

Annat:

2 Frågor om varje provtagen box

Box 1

2.1 Syns strö i boxen?

- Rikligt  
 Spår av strö  
 Nästan inte alls

2.2 Hur många grisar finns i boxen?

2.3 Hur gamla (antalet veckor) är grisarna i boxen?

Box 2

2.4 Syns strö i boxen?

- Rikligt  
 Spår av strö  
 Nästan inte alls

2.5 Hur många grisar finns i boxen?

2.6 Hur gamla (antalet veckor) är grisarna i boxen?

Box 3

2.7 Syns strö i boxen?

- Rikligt  
 Spår av strö  
 Nästan inte alls

2.8 Hur många grisar finns i boxen?

2.9 Hur gamla (antalet veckor) är grisarna i boxen?

Box 4

2.10 Syns strö i boxen?

- Rikligt  
 Spår av strö  
 Nästan inte alls

2.11 Hur många grisar finns i boxen?

2.12 Hur gamla (antalet veckor) är grisarna i boxen?

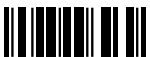

9999

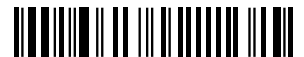

2592647537 0002
